# Supplementary material for: Pectin methylesterases contribute the pathogenic differences between races 1 and 4 of Fusarium oxysporum f. sp. cubense
Source: PubMed Central journal article supplement (PMC5640671; doi:10.1038/s41598-017-13625-4), 2017-10-13
Supplement: 41598_2017_13625_MOESM1_ESM.pdf [file 41598_2017_13625_MOESM1_ESM.pdf]

Pectin methylesterases contribute the pathogenic differences between races 1 and 4 of  
*Fusarium oxysporum* f. sp. *cubense*

Huiyun Fan<sup>1</sup>, Honghong Dong<sup>1</sup>, Chunxiang Xu<sup>2</sup>, Jing Liu<sup>2</sup>, Bei Hu<sup>2</sup>, Jingwen Ye<sup>1</sup>, Guiwan Mai<sup>1</sup>, Huaping Li<sup>1\*</sup>

<sup>1</sup>State Key Laboratory of Conservation and Utilization of Subtropical Agro-bioresources,  
Guangdong Province Key Laboratory of Microbial Signals and Disease Control, College  
of Agriculture, South China Agricultural University, Guangzhou 510642, China.

<sup>2</sup>College of Horticulture, South China Agricultural University, Guangzhou 510642, China;

\*Correspondence to huaping@scau.edu.cn

**Table S1** Primers for quantitative real-time PCR

| Gene          | GeneBank number | Primer sequences (Forward/ Reverse)                          | Product size (bp) |
|---------------|-----------------|--------------------------------------------------------------|-------------------|
| <i>MaPME1</i> | FJ264505.1      | GCTACCAAGACACCCTCTAC<br>GTACAAGTTGCAGTTCTGGAGC               | 84                |
| <i>RPS2</i>   | HQ853246.1      | TAGGGATTCCGACGATTTGTTT<br>TAGCGTCATCATTGGCTGGGA              | 122               |
| <i>CHS2</i>   | XM_009405523.2  | GCATCACCAGGAGCAACCAC<br>CATGTACGCGCCGATGTTAG                 | 137               |
| <i>CHS3</i>   | XM_009406457.2  | CGGCAGGTGCTGAGCGAGTA<br>GTGGTTGCCTTTCCGTCCTC                 | 101               |
| <i>CalS5</i>  | XM_018828485.1  | GACCTTATAAGTGACAGGAAAGAGATGG<br>CACAGATGCGTTTCCACAGATCAGAATC | 175               |
| <i>PAL</i>    | XM_009419417.2  | ACATATCCTAAGAAGCCCCACCACC<br>TCGTCAAAGTGGGCACAAGAGAG         | 206               |
| <i>JAZ</i>    | XM_009411294.2  | TGCAAGAGGTTTCATCATAGGACAGT<br>TCTTCAGACATGGAAGTGGCCTC        | 198               |
| <i>GST</i>    | XM_009409198.2  | CCTTCAGATGTTCTTCCAGTGCATG<br>TGTTATCACGGCGATCATTGAGGAG       | 185               |

**Table S2** Antibodies recognizing different HGs and their antigens

| Antibody          | Antigen                                                                                                  | Secondary antibody  |
|-------------------|----------------------------------------------------------------------------------------------------------|---------------------|
| JIM5 <sup>1</sup> | Partially methyl-esterified HG epitope:<br>unesterified and partially esterified residues<br>(up to 40%) | Anti-rat-IgG-FITC   |
| JIM7 <sup>1</sup> | Partially methyl-esterified HG epitope:<br>methyl-esterified residues (up to 80%)                        | Anti-rat-IgG-FITC   |
| LM19 <sup>2</sup> | Low methyl-esterified HG                                                                                 | Anti-rat-IgG-FITC   |
| LM20 <sup>2</sup> | Highly methyl-esterified HG                                                                              | Anti-rat-IgG-FITC   |
| 2F4 <sup>3</sup>  | Un-esterified/Calcium ion cross-linked HG                                                                | Anti-mouse-IgG-FITC |

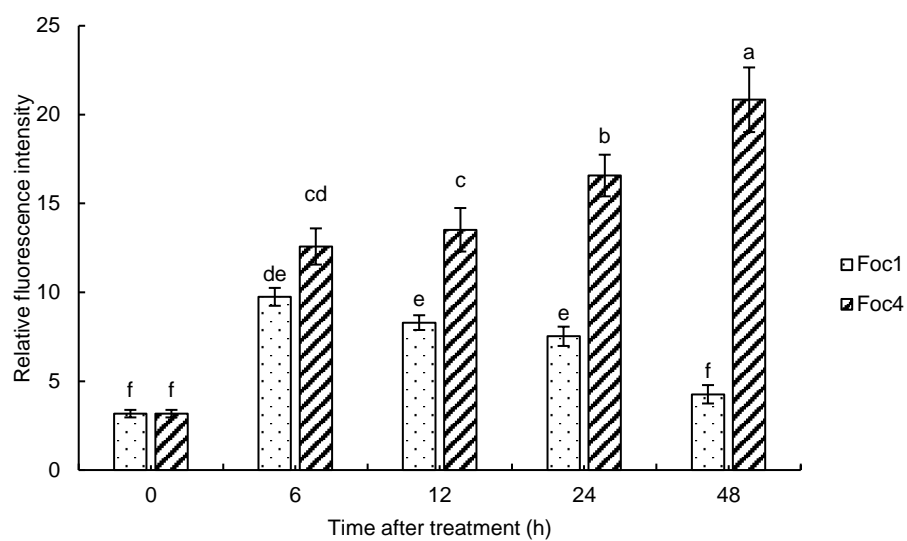

**Figure S1** The relative fluorescence intensity of PME in banana (*Musa* spp. AAA) roots after infection with *Fusarium oxysporum* f. sp.cubense. Foc1: *Fusarium oxysporum* f. sp.cubense race 1; Foc4: *Fusarium oxysporum* f. sp.cubense race 4. For quantification of fluorescence signal, the mean relative fluorescence intensity (n =3 sections of roots) was measured with ZEN 2012 software.

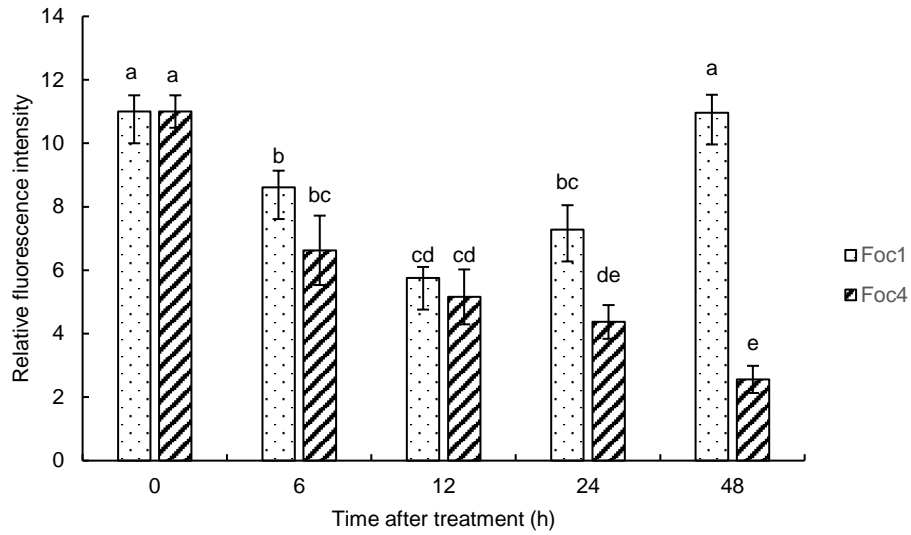

**Figure S2** The relative fluorescence intensity of pectins recognized by LM20 in banana (*Musa* spp. AAA) roots after infection with *Fusarium oxysporum* f. sp. *cubense*. *Foc1*: *Fusarium oxysporum* f. sp. *cubense* race 1; *Foc4*: *Fusarium oxysporum* f. sp. *cubense* race 4. For quantification of fluorescence signal, the mean relative fluorescence intensity (n =3 sections of roots) was measured with ZEN 2012 software.

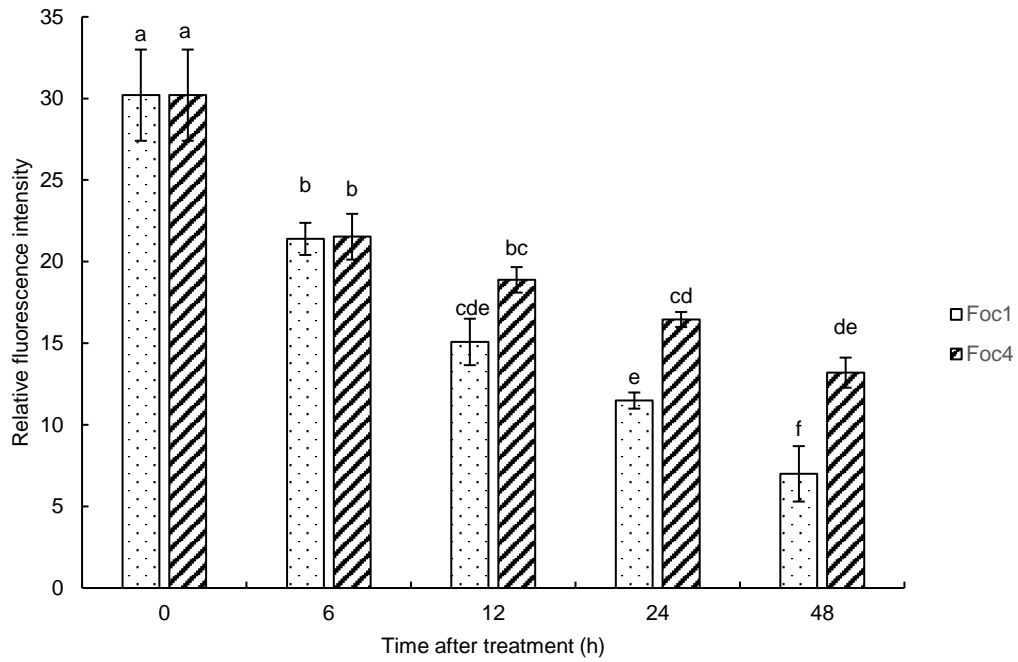

**Figure S3** The relative fluorescence intensity of pectins recognized by LM19 in banana (*Musa* spp. AAA) roots after infection with *Fusarium oxysporum* f. sp. cubense.

*Foc1*: *Fusarium oxysporum* f. sp. cubense race 1; *Foc4*: *Fusarium oxysporum* f. sp. cubense race 4. For quantification of fluorescence signal, the mean relative fluorescence intensity (n = 3 sections of roots) was measured with ZEN 2012 software.

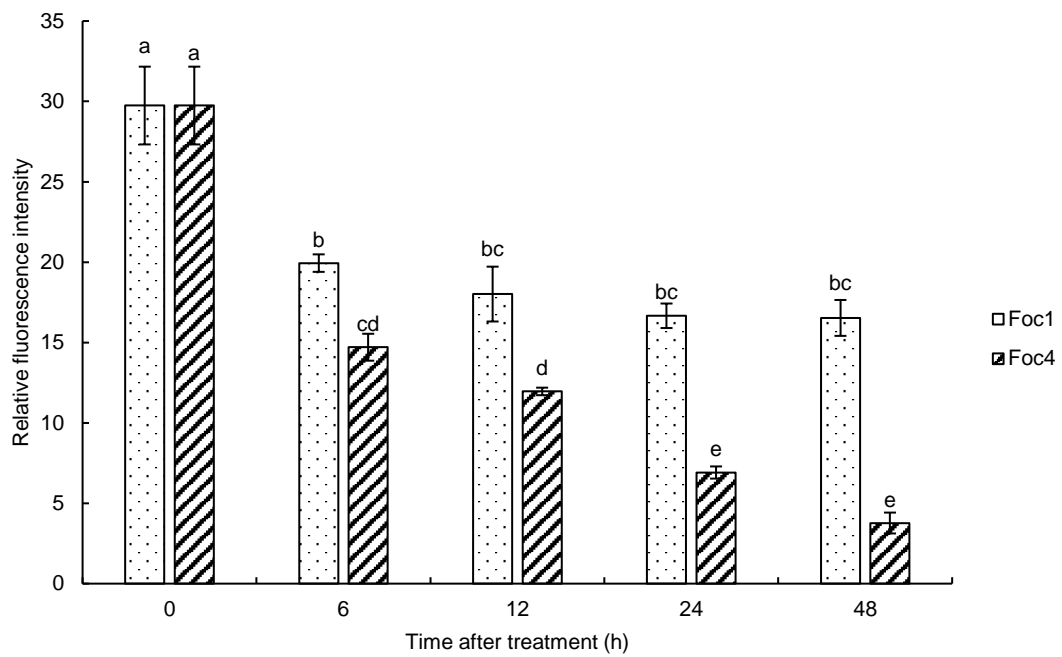

**Figure S4** The relative fluorescence intensity of pectins recognized by JIM7 in banana (*Musa* spp. AAA) roots after infection with *Fusarium oxysporum* f. sp. cubense.

*Foc1*: *Fusarium oxysporum* f. sp. cubense race 1; *Foc4*: *Fusarium oxysporum* f. sp. cubense race 4. For quantification of fluorescence signal, the mean relative fluorescence intensity (n =3 sections of roots) was measured with ZEN 2012 software.

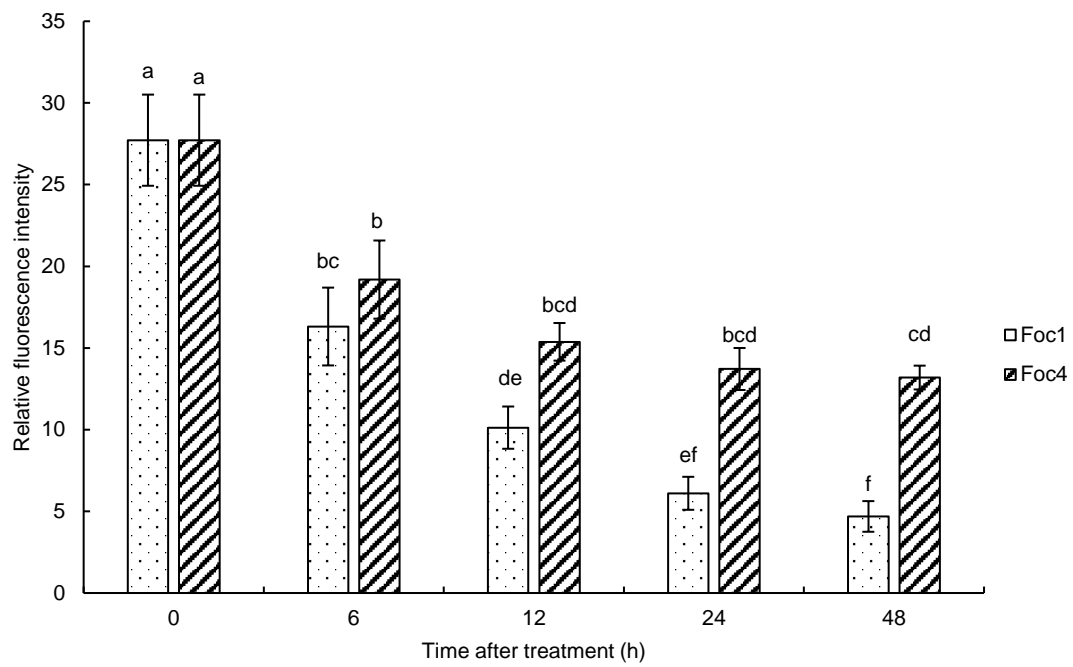

**Figure S5** The relative fluorescence intensity of pectins recognized by JIM5 in banana (*Musa* spp. AAA) roots after infection with *Fusarium oxysporum* f. *sp.cubense*.

*Foc1*: *Fusarium oxysporum* f. *sp.cubense* race 1; *Foc4*: *Fusarium oxysporum* f. *sp.cubense* race 4. For quantification of fluorescence signal, the mean relative fluorescence intensity (n =3 sections of roots) was measured with ZEN 2012 software.

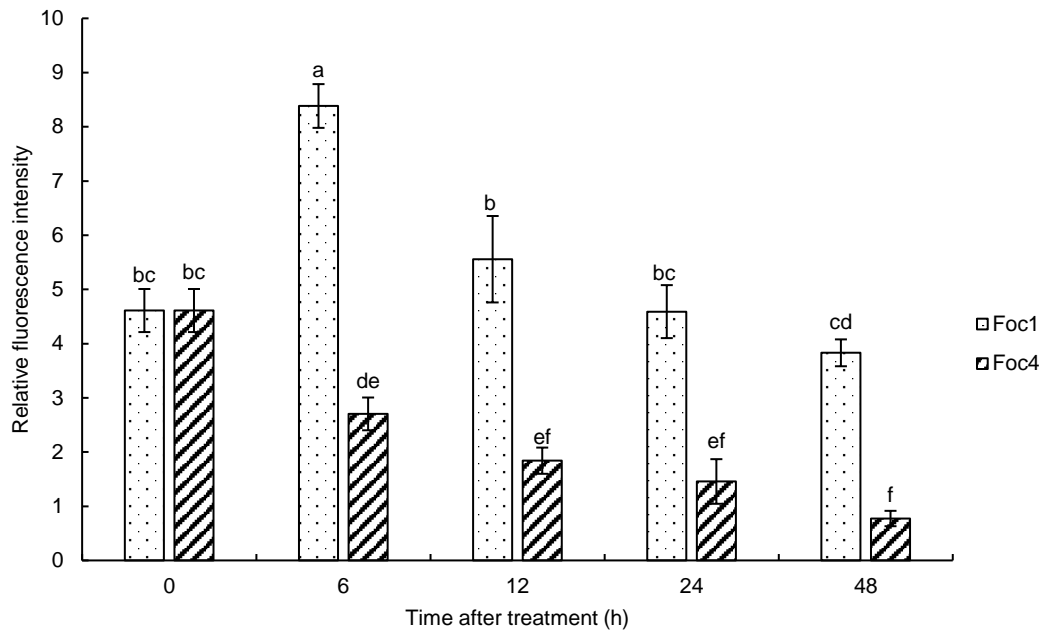

**Figure S6** The relative fluorescence intensity of pectins recognized by 2F4 in banana (*Musa* spp. AAA) roots after infection with *Fusarium oxysporum* f. *sp.cubense*.

*Foc1*: *Fusarium oxysporum* f. *sp.cubense* race 1; *Foc4*: *Fusarium oxysporum* f. *sp.cubense* race 4. For quantification of fluorescence signal, the mean relative fluorescence intensity (n =3 sections of roots) was measured with ZEN 2012 software.



## References:

1. Knox, J.P., Linstead, P.J., King, J., Cooper, C. & Roberts, K. Pectin esterification is spatially regulated both within cell walls and between developing tissues of root apices. *Planta* (1990).
2. Verherbruggen, Y., Marcus, S.E., Haeger, A., Ordaz-Ortiz, J.J. & Knox, J.P. An extended set of monoclonal antibodies to pectic homogalacturonan. *Carbohydrate Research***344**, 1858-1862 (2009).
3. Liners, F.O., Letesson, J.J., Didembourg, C. & Cutsem, P.V. Monoclonal Antibodies against Pectin. *Plant Physiology***91**, 1419-24 (1989).
